# Supplementary material for: Arabidopsis heterotrimeric G proteins regulate immunity by directly coupling to the FLS2 receptor
Source: eLife. 2016 Apr 4;5:e13568. doi: 10.7554/eLife.13568 (PMC4846371; doi:10.7554/eLife.13568)
Supplement: Figure 1—source data 1. — DOI: http://dx.doi.org/10.7554/eLife.13568.004 [file elife-13568-fig1-data1.xlsx]

## Sheet: Figure 1A
Figure 1A
water treatment										Mean	SD
Col-0	5.25527	5.09691	4.94201	4.77815	4.96614	4.92942	4.57403	5		4.94274	0.203008
xlg3	5.17609	5.1383	5	4.87506	4.86034	4.72016	4.92942	4.67669		4.92201	0.179049
xlg23	5.8451	6.06539	6.0054	6.14223	5.45864	5.90309	5.93576	6.16879		5.94055	0.225305
xlg2	6.13434	5.76901	5.90982	5.45864	5.99454	5.86776	5.97772	5.74036		5.85652	0.204712
agb1	5.1383	5.35218	5.09691	5.38471	5.33746	5.34733	5.0607	5.32736		5.25562	0.13266
p values
	xlg2	agb1	Col-0	xlg3
xlg2 xlg3	0.447974	3.30453e-06	2.25993e-07	9.22125e-08
xlg2		6.57917e-06	3.55268e-07	1.32827e-07
agb1			1.32827e-07	0.000832931
Col-0				0.831608
Flg22 treatment
Col-0	3.03141	2.54407	2.8893	3.30103	2.86034	3.10551	3.11394	2.97772		2.97792	0.224229
xlg3	3.19728	3.30643	3.22401	2.79588	3.31702	2.92942	3.1383	3.38021		3.16107	0.202233
xlg2	3.67669	4.02119	3.57403	4.07004	3.75967	3.57403	3.62839	3.81291		3.76462	0.192874
xlg23	4.11394	4.01072	3.43933	3.57403	4.12222	3.81291	3.79588	3.94201		3.85138	0.247028
agb1	4.04139	4.07004	4.24304	3.79588	3.94201	3.57403	3.8293	3.69897		3.89933	0.217403
p values
	xlg2 xlg3	xlg2	xlg3	Col-0
agb1	0.686467	0.210939	5.93437e-06	8.35378e-07
xlg2 xlg3		0.446666	2.66937e-05	3.32582e-06
xlg2			2.70296e-05	2.77922e-06
xlg3				0.10827

## Sheet: Figure 1B
Figure 1B
Water treatment					mean	SD
col-0	45	52	36		44.3333	8.02081
xlg3	46	38	28		37.3333	9.0185
xlg2	49	34	58		47	12.1244
xlg2 xlg3	43	23	32		32.6667	10.0167
agb1	45	41	53		46.3333	6.1101
Flg22 treatment										mean	SD
xlg3	2846	2634	2312	2736	3076	4561	2262	3605		3004	760.991
xlg2	1012	778	834	1148	896	1252	708	980		951	185.034
xlg2 xlg3	648	884	696	674	614	720	668	630		691.75	84.876
agb1	528	902	470	404	968	312	484	312		547.5	251.97
col-0	3400	3240	3904	2734	3190	2066	3030			3080.57	572.929
p values
	xlg3	xlg2	xlg2 xlg3	agb1
Col-0	0.831305	1.83812e-07	2.80235e-08	4.0291e-08
xlg3		3.27921e-06	6.34077e-07	5.32344e-07
xlg2			0.00288693	0.00262095
xlg2 xlg3				0.147186

## Sheet: Figure1-supplement 1
Figure 1-S1
											Mean	SD
xlg2-L10-flg22		4663	4609	4226	5653	4457	2614	4991	696		3988.62	1586.61
Col-0-flg22		3362	4569	4248	4693	4907	3728	4440	5137		4385.5	593.618
xlg2-flg22		1478	1316	1326	2266	2596	2010	1414	2126		1816.5	494.337
xlg2-L11-flg22		2840	6185	4022	5979	3736	3622	4156	4573		4389.12	1158.24
Col-0-H2O		12	30	20	18						20	7.48331
xlg2-L11-H2O		22	14	8	20						16	6.32456
xlg2-H2O		12	26	20	28						21.5	7.18795
xlg2-L10-H2O		20	14	22	18						18.5	3.41565
p values
		Col-0-flg22	xlg2-L10-flg22	xlg2-flg22
xlg2-L11-flg22		0.993826	0.573326	4.78294e-05
Col-0-flg22			0.51832	1.98319e-07
xlg2-L10-flg22				0.00239177
xlg2-flg22
