# Supplementary material for: Arabidopsis heterotrimeric G proteins regulate immunity by directly coupling to the FLS2 receptor
Source: eLife. 2016 Apr 4;5:e13568. doi: 10.7554/eLife.13568 (PMC4846371; doi:10.7554/eLife.13568)
Supplement: Figure 4—source data 1. — DOI: http://dx.doi.org/10.7554/eLife.13568.017 [file elife-13568-fig4-data1.xlsx]

## Sheet: Figure 4B
Figure 4B
														Mean	SD
agb1 NP::BIK1-HA		1896	1240	844	2928	2174	2300	2406	1388	1524	1972	2448		1920	616.705
Col-0 NP::BIK1-HA		2258	2318	4871	3634	3384	4697	3152	2088	3362	6599			3636.3	1407.74
agb1		278	424	490	386	968	416	284	746	518	480	868		532.545	229.326
Col-0		2700	2100	2238	3688	2480	2030	2082	1918	3530				2529.56	658.386
p value
	Col-0	agb1 NP::BIK1-HA	agb1
Col-0 NP::BIK1-HA	0.0265166	0.00158777	7.3402e-07
Col-0		0.0468715	2.1773e-08
agb1 NP::BIK1-HA			8.70867e-07

## Sheet: Figure 4C
Figure 4C
water treatment
												Mean	SD
Col-0		5.13033	5.07004	4.81291	4.79588	5.01072	4.989	5.25527	4.8451			4.98866	0.163412
agb1		5.08814	5.20412	5.21748	4.51188	5.09691	5.26717	5.21748	5.45864			5.13273	0.275804
Col-0 NP::BIK1-HA		4.8893	4.989	4.86034	4.90309	5.4624	4.8893	4.67669	4.39794			4.88351	0.298993
agb1 NP::BIK1-HA		5.273	5.19033	5.24304	4.96614	5	4.87506	5.05115	4.90309			5.06273	0.154508
p values
	agb1 NP::BIK1-HA	Col-0	Col-0 NP::BIK1-HA
agb1	0.541199	0.224403	0.105072
agb1 NP::BIK1-HA		0.367354	0.154253
Col-0			0.397473
Flg22 treatment
										Mean	SD
Col-0	2.57403	2.60206	3.01072	2.87506	2.57403	2.57403	2.54407	2.51188		2.65824	0.181321
agb1	3.43136	3.55023	3.38471	3.33244	3.15381	3.21748	3.59934			3.38134	0.163079
Col-0 NP::BIK1-HA	2.51188	2.57403	2.35218	2.30103	2.57403	2.43933	2.43933	2.47712		2.45862	0.0976337
agb1 NP::BIK1-HA	2.67669	2.67669	2.51188	3.37107	3.02119	3.01072	2.86034			2.87551	0.28769
p values
	agb1 NP::BIK1-HA	Col-0	Col-0 NP::BIK1-HA
agb1	0.00161934	2.03366e-06	4.96827e-09
agb1 NP::BIK1-HA		0.0991984	0.00193424
Col-0			0.0194773

## Sheet: Figure 4D
Figure 4D
																			Mean	SD
Col-0-L32		2846	3198	2696	2224	7231	6685	7417	5225	3474	3506	4100							4418.36	1904.21
Col-0		4615	1324	2438	3370	6409	4469	4320	1756	4040	3116								3585.7	1513.04
xlg2/3-L64		2494	1884	2134	2628	1048	2066	3736	4479	3120	2522	2512	3458	1610	4022	1802	3496		2688.19	952.001
xlg2/3-L51		2414	3232	3372	3848	2262	2082	1456	1568										2529.25	870.451
xlg2/3		712	1540	838	1334	750	780	106	940										875	431.125
p values
	Col-0	xlg2/3-L64	xlg2/3-L51	xlg2/3
Col-0-L32	0.284405	0.00442926	0.0186763	8.3521e-05
Col-0		0.074431	0.0992203	0.00016547
xlg2/3-L64			0.6959	4.24922e-05
xlg2/3-L51				0.000136881

## Sheet: Figure 4E
Figure 4E
Water treatment														Mean	SD
Col-0(-)	6.54562	6.39138	6.4413	6.37794	6.60342	6.64836	6.56967	6.55023						6.51599	0.100185
flg22 treatment
Col-0(+)	2.09691	2.17609	2.90309	2.30103	2.30103	2.54407	2.8293							2.45022	0.316779
xlg2/3	3.37107	2.60206	3.65562	3.63347	3.21748	3.40226								3.31366	0.38626
Col-0-L32	2.35218	1.87506	2.30103	2.67669	2.86034	1.87506	2.30103	1.69897						2.24255	0.406128
xlg2/3-L51	2.79588	3.10551	2.96614	3.02119	2.47712	2.24304	2.60206	2.24304						2.68175	0.342648
xlg2/3-L64	2.94201	2.8293	2.96614	3.28443	2.57403	3.03141	3.32736	2.57403	2.67669	3.21748				2.94229	0.279706
p values
	xlg2/3	xlg2/3-L64	xlg2/3-L51	Col-0(+)	Col-0-L32
Col-0(-)	3.10759e-11	2.12729e-16	3.50937e-14	3.54789e-14	6.99794e-14
xlg2/3		0.0422671	0.00712511	0.00100614	0.000317935
xlg2/3-L64			0.0943136	0.00409239	0.000519288
xlg2/3-L51				0.199524	0.0347586
Col-0(+)					0.294839
