# Supplementary material for: Arabidopsis heterotrimeric G proteins regulate immunity by directly coupling to the FLS2 receptor
Source: eLife. 2016 Apr 4;5:e13568. doi: 10.7554/eLife.13568 (PMC4846371; doi:10.7554/eLife.13568)
Supplement: Figure 5—source data 1. — DOI: http://dx.doi.org/10.7554/eLife.13568.019 [file elife-13568-fig5-data1.xlsx]

## Sheet: Figure 5E
Figure 5E
water treatment					mean	SD
4A-L7	36	29	51		38.6667	11.2398
4A-L1	19	45	46		36.6667	15.308
4D-L7	65	34	32		43.6667	18.5023
4D-L9	55	30	20		35	18.0278
XLG2-L34	19	34	46		33	13.5277
Col-0	14	29	35		26	10.8167
xlg2	58	41	33		44	12.7671
flg22 treatment
								mean	SD
4A-L7	1910	1738	2702	2632	2723	1750		2242.5	490.176
4A-L1	1816	2166	2580	2886	2306	2150		2317.33	372.758
4D-L7	2677	4021	3486	3578	2944	3815		3420.17	514.815
4D-L9	3560	2766	3166	3952	2282	3310		3172.67	589.06
XLG2-L34	3932	1942	3530	3669	3094	2600		3127.83	746.624
Col-0	2788	2732	2150	4242	2998	3338		3041.33	705.1
xlg2	1216	1258	1536	1560	1059	1081		1285	217.627
p values
	4D-L9	XLG2-L34	Col-0	4A-L1	4A-L7	xlg2
4D-L7	0.45631	0.448095	0.312824	0.00168911	0.00229363	2.91174e-06
4D-L9		0.910355	0.733498	0.0132184	0.0139699	2.41666e-05
XLG2-L34			0.84068	0.0386762	0.0355688	0.000171941
Col-0				0.0503906	0.0458945	0.000166037
4A-L1					0.772053	0.000159786
4A-L7						0.00139223

## Sheet: Figure 5F
Figure 5F
										mean	SD
Col-0	5.07918	5.07918	5.14613	5.17609	5.27875	5.11394	5.04139	5.23045		5.14314	0.0814994
xlg2/3	5.87506	5.66276	5.9345	5.63347	5.86332	6.14301	5.73239	5.83885		5.83542	0.163883
4A-L6	5.44716	5.41497	5.4624	5.5563	5.6902	5.78533	5.90309	5.65321		5.61408	0.174859
4A-L7	5.49136	5.86923	5.79934	5.65321	5.75587	5.49136	5.77815	5.63347		5.684	0.1411
XLG2-L3	5.23045	5.04139	5.25527	5.50515	5.43136	4.8451	5.25527	5.17609		5.21751	0.208022
p value
	xlg2/3	4A-L7	4A-L6	XLG2-L3
4A-L7	0.0676552
4A-L6	0.0204819	0.393642
XLG2-L3	1.19025e-05	0.000123041	0.00102545
Col-0	4.02442e-08	2.02977e-07	7.27089e-06	0.362399
