# Supplementary material for: Arabidopsis heterotrimeric G proteins regulate immunity by directly coupling to the FLS2 receptor
Source: eLife journal article supplement (doi:10.7554/elife.13568), 2016-04-04
Supplement: figures [file elife-13568-figures-v2.pdf]

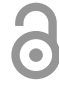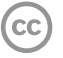

---

## Figures and figure supplements

Arabidopsis heterotrimeric G proteins regulate immunity by directly coupling to the FLS2 receptor

**Xiangxiu Liang et al**

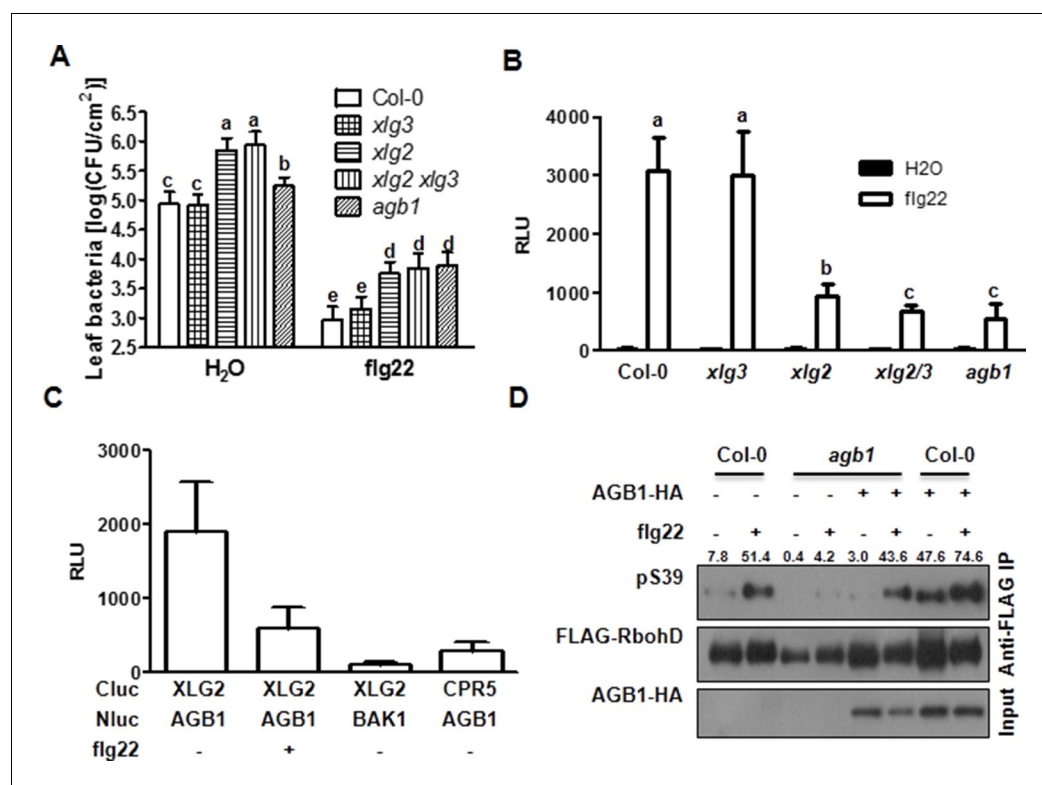

**Figure 1.** G proteins are required for FLS2-mediated immunity. (A) XLG2/3 and AGB1 play overlapping but not identical roles in disease resistance to *Pst*. Plants of indicated genotypes were infiltrated with H<sub>2</sub>O and flg22 1 day before infiltration with *P. syringae* DC3000, and bacteria number was determined 2 days later (mean  $\pm$  SD;  $n \geq 6$ ;  $p < 0.05$ , Student's t-test; different letters indicate significant difference). (B) *xlg2/3* and *agb1* are similarly compromised in flg22-induced ROS burst. Leaves of the indicated genotypes were examined for flg22-induced ROS production, and peak RLU values are shown (mean  $\pm$  SD;  $n \geq 6$ ;  $p < 0.05$ , Student's t-test; different letters indicate significant difference). (C) Flg22 treatment disrupts XLG2-AGB1 interaction. Cluc-XLG2 and AGB1-HA-Nluc constructs are transiently expressed in *Nb* leaves, relative luminescence unit (RLU) was measured 2 days later. Cluc-CPR5 and BAK1-HA-Nluc were used as negative control (mean  $\pm$  SD;  $n \geq 6$ ). (D) Flg22-induced RbohD phosphorylation is impaired in *agb1*. FLAG-RbohD and/or AGB1-HA constructs were expressed under control of the 35S promoter in WT or *agb1* protoplasts. The FLAG-RbohD protein was affinity purified and subject to anti-FLAG and anti-pSer39 immunoblot analyses. Numbers indicate arbitrary units of RbohD pS39 phosphorylation calculated from densitometry measurements normalized to total FLAG-RbohD protein. Each experiment was repeated three times, and data of one representative experiment are shown.

DOI: [10.7554/eLife.13568.003](https://doi.org/10.7554/eLife.13568.003)

The following source data is available for figure 1:

**Source data 1.** Raw data and exact p value of **Figure 1A, B** and **Figure 1—figure supplement 1**.

DOI: [10.7554/eLife.13568.004](https://doi.org/10.7554/eLife.13568.004)

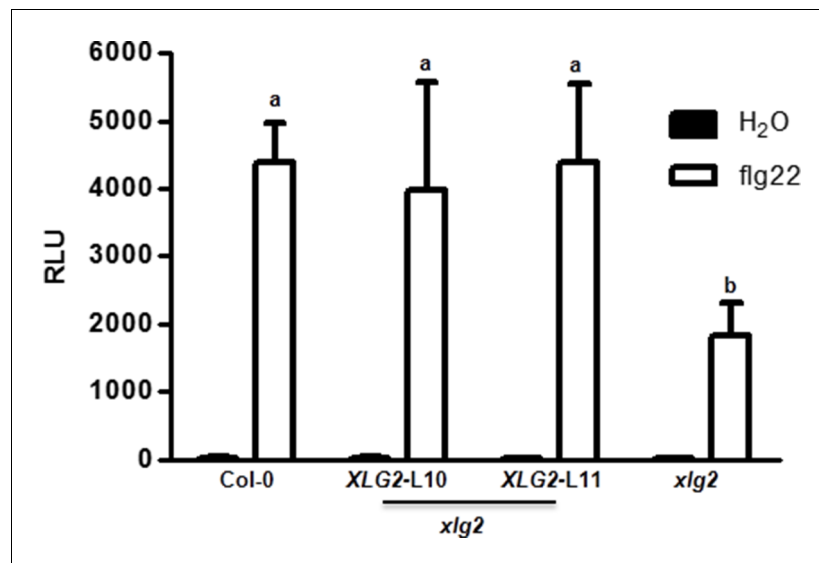

**Figure 1—figure supplement 1.** Flg22-induced ROS burst is compromised in *xlg2* plants. Flg22-induced ROS burst is compromised in *xlg2* plants. Col-0, *xlg2*, and *xlg2* transgenic lines complemented with the *XLG2* transgene under control of the *XLG2* native promoter were examined for flg22-induced ROS burst. RLU represent peak value of ROS production after flg22 treatment (mean  $\pm$  SD;  $n \geq 6$ ; representative data from three independent experiments are shown).

DOI: [10.7554/eLife.13568.005](https://doi.org/10.7554/eLife.13568.005)

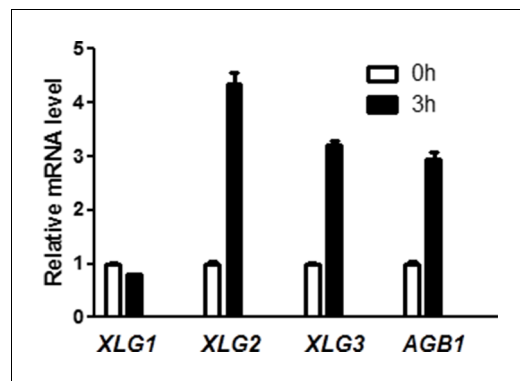

**Figure 1—figure supplement 2.** *XLG2/3* and *AGB1*, but not *XLG1*, are transcriptionally induced by flg22. qRT-PCR analyses of the indicated genes in WT plants 0 hr and 3 hr after infiltration with flg22. Representative data from three independent experiments are shown. DOI: [10.7554/eLife.13568.006](https://doi.org/10.7554/eLife.13568.006)

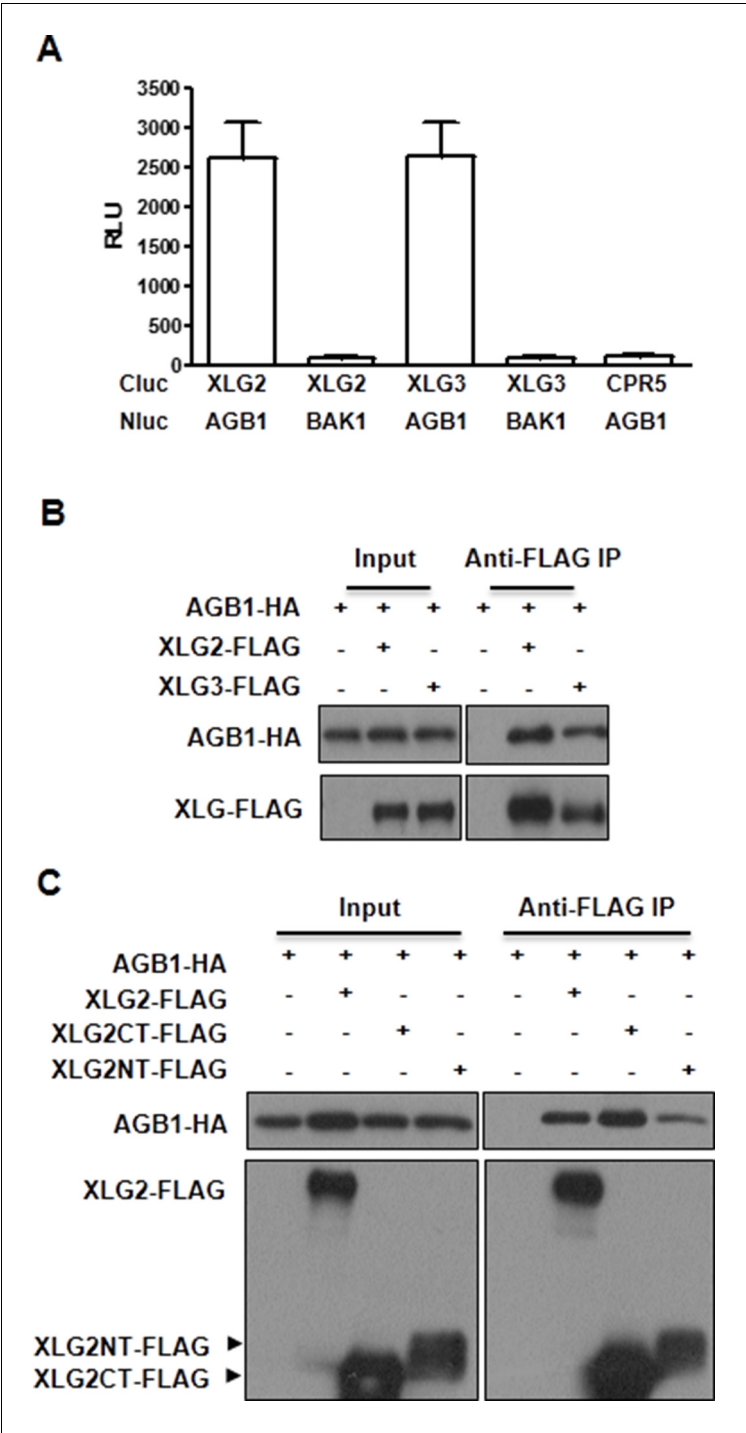

**Figure 1—figure supplement 3.** XLG2/3 interact with AGB1 through both N and C termini. **(A)** Luciferase complementation assay for XLG2/3-AGB1 interactions in *Nb* plants. *Nb* leaves were infiltrated with *Agrobacterium tumefaciens* strains carrying the indicated constructs and luciferase activity was recorded 2 days later (mean  $\pm$  SD;  $n \geq 6$ ; representative data from three independent experiments are shown). **(B)** Co-IP assay for XLG2/3-AGB1 interaction in protoplasts. Three independent experiments were performed with similar results. **(C)** Both N and C termini of XLG2 interact with AGB1. XLG2NT-FLAG contains amino acids 1–458 whereas XLG2CT-FLAG contains amino acids 459–861. The indicated constructs were expressed in WT protoplasts, immunoprecipitated with agarose-conjugated FLAG antibody, and the immune complex was subject to immunoblot with specific antibodies.  
[DOI: 10.7554/eLife.13568.007](https://doi.org/10.7554/eLife.13568.007)

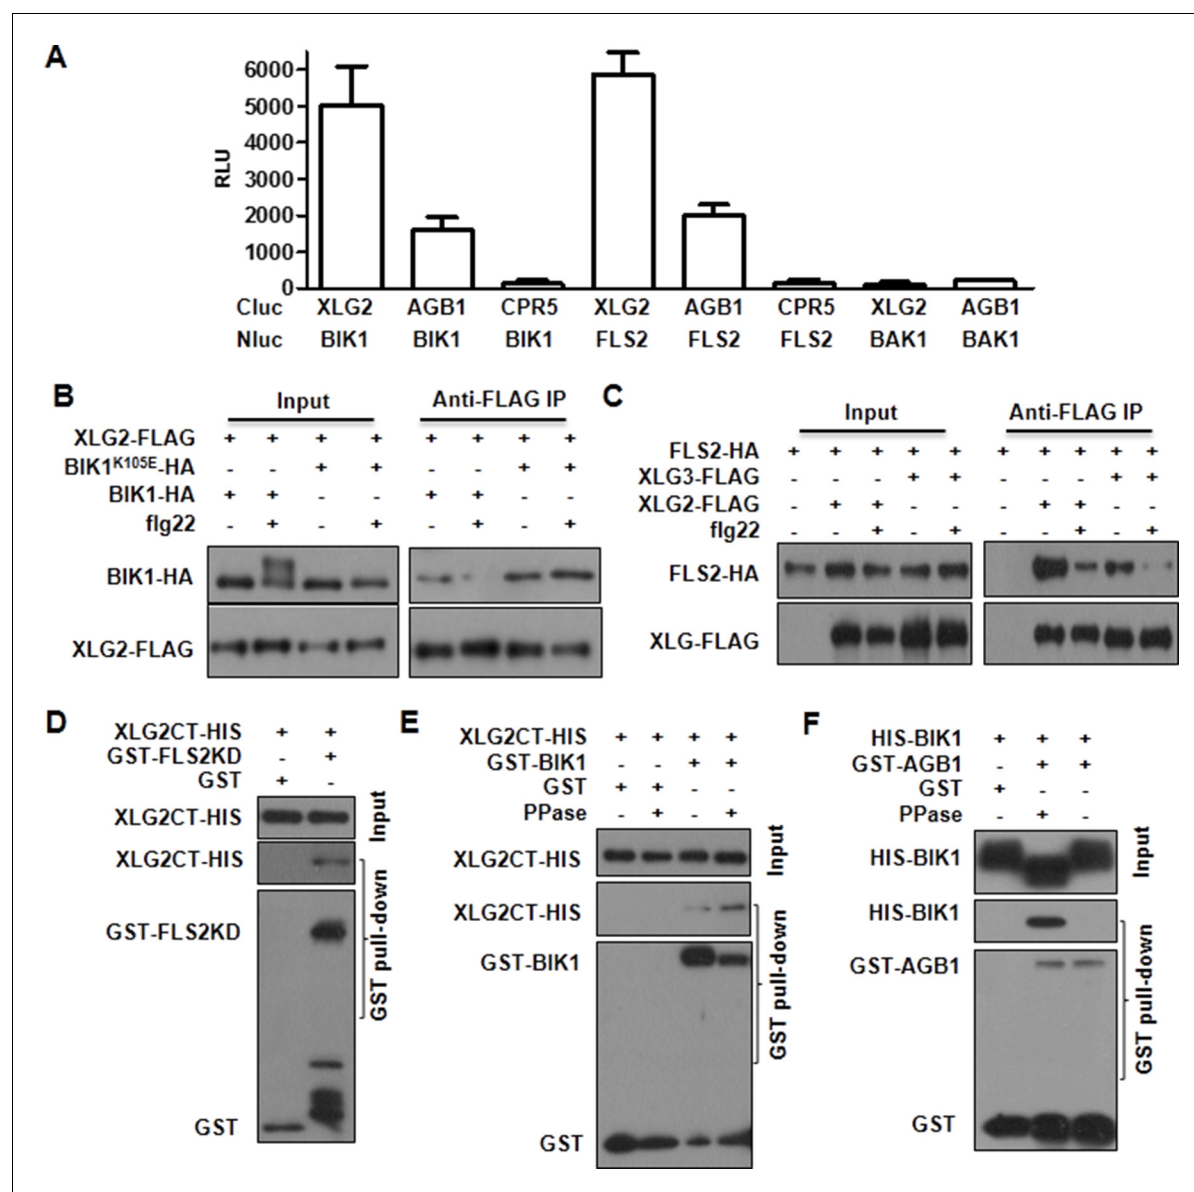

**Figure 2.** Flg22 regulates interactions between G proteins and the FLS2-BIK1 receptor complex. (A) XLG2 and AGB1 interact with BIK1 and FLS2 in *Nb* plants. The indicated Nluc and Cluc constructs were transiently expressed in *Nb* plants for luciferase complementation assay. Relative luminescence unit (RLU) shows the strength of protein-protein interaction (mean  $\pm$  SD;  $n \geq 6$ ). (B) XLG2 interacts with BIK1 in Arabidopsis protoplasts and the interaction is dynamically regulated by flg22. (C) XLG2/3 interact with FLS2 in Arabidopsis protoplasts and the interaction is dynamically regulated by flg22. The indicated constructs were co-expressed in WT protoplasts, and Co-IP assays were performed using agarose-conjugated anti-FLAG antibody. BIK1<sup>K105E</sup> carries a mutation in the ATP-binding site. (D) The C terminus of XLG2 directly interacts with FLS2 kinase domain. XLG2CT-HIS (amino acids 459–861) was incubated with GST or GST-FLS2KD (FLS2 kinase domain) for GST pull-down assay and detected by anti-HIS and anti-GST immunoblots. (E) XLG2 primarily interacts with non-phosphorylated BIK1. XLG2CT-HIS was incubated with GST or GST-BIK1 that was untreated or pre-treated with  $\lambda$  phosphatase (PPase), and GST pull-down assay was performed. (F) AGB1 interacts with the non-phosphorylated BIK1. Untreated or PPase-treated BIK1-HIS was incubated with GST or GST-AGB1, and GST pull-down assay was performed. Each experiment was repeated two (D–F) or three (A–C) times, and data of one representative experiment are shown.

DOI: [10.7554/eLife.13568.008](https://doi.org/10.7554/eLife.13568.008)

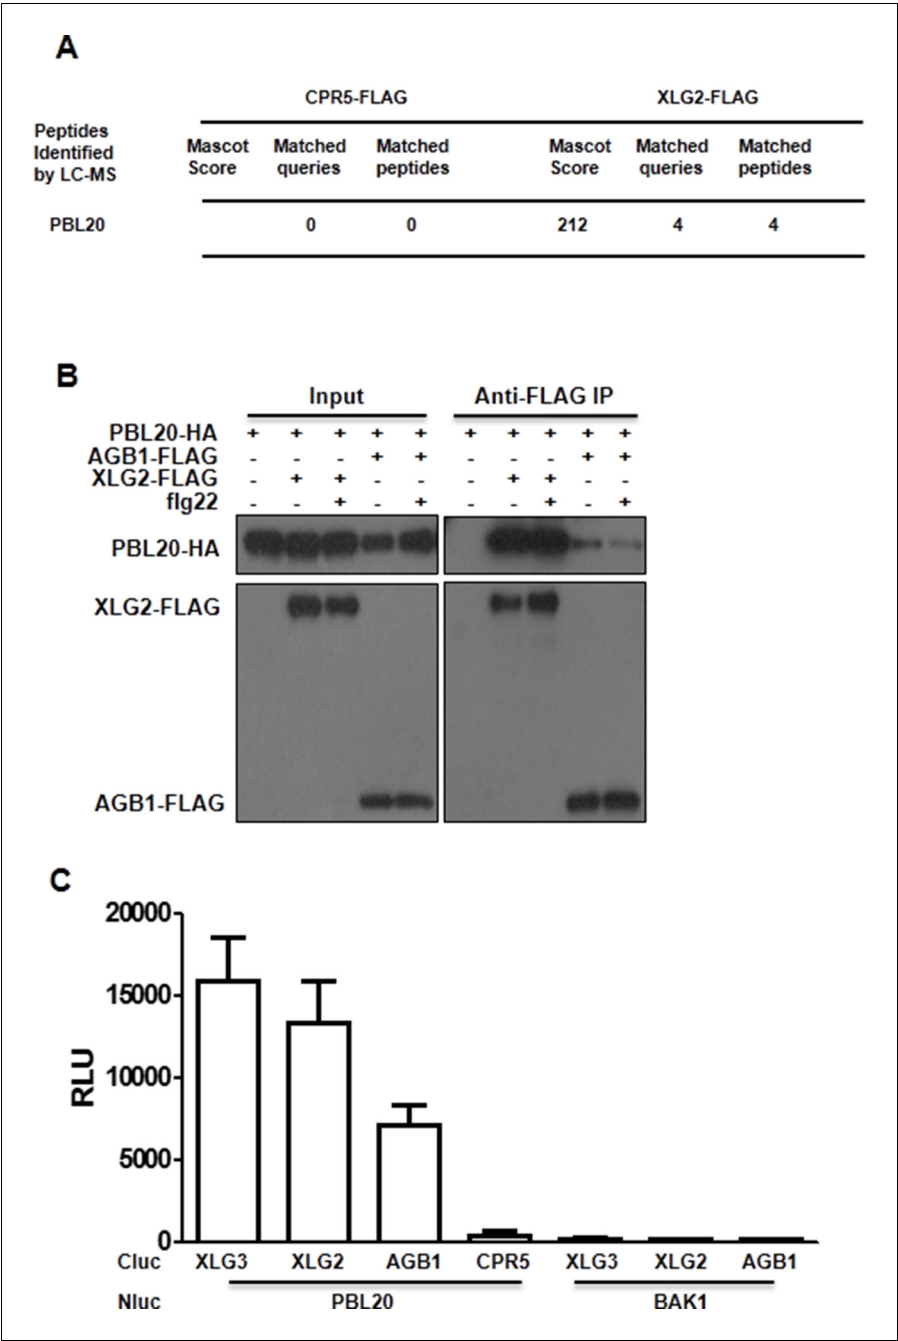

**Figure 2—figure supplement 1.** PBL20 interacts with G proteins. (A) Identification of PBL20 as a XLG2-interacting protein. XLG2-FLAG was expressed in protoplasts, isolated by anti-FLAG immunoprecipitation and subject to LC-MS/MS. No PBL20 peptides were identified in the control experiment using CPR5-FLAG as bait. (B) PBL20 interacts strongly with XLG2 and weakly with AGB1 in Arabidopsis protoplasts. Co-IP assay was performed using Arabidopsis protoplasts transfected with the indicated constructs. Three independent experiments were performed with similar results. (C) PBL20 interacts with XLG2 in *Nb* plants. *Nb* leaves were infiltrated with Agrobacteria containing the indicated constructs and luciferase activity was recorded 2 days later (mean  $\pm$  SD;  $n \geq 6$ ; representative data from two independent experiments are shown). DOI: 10.7554/eLife.13568.009

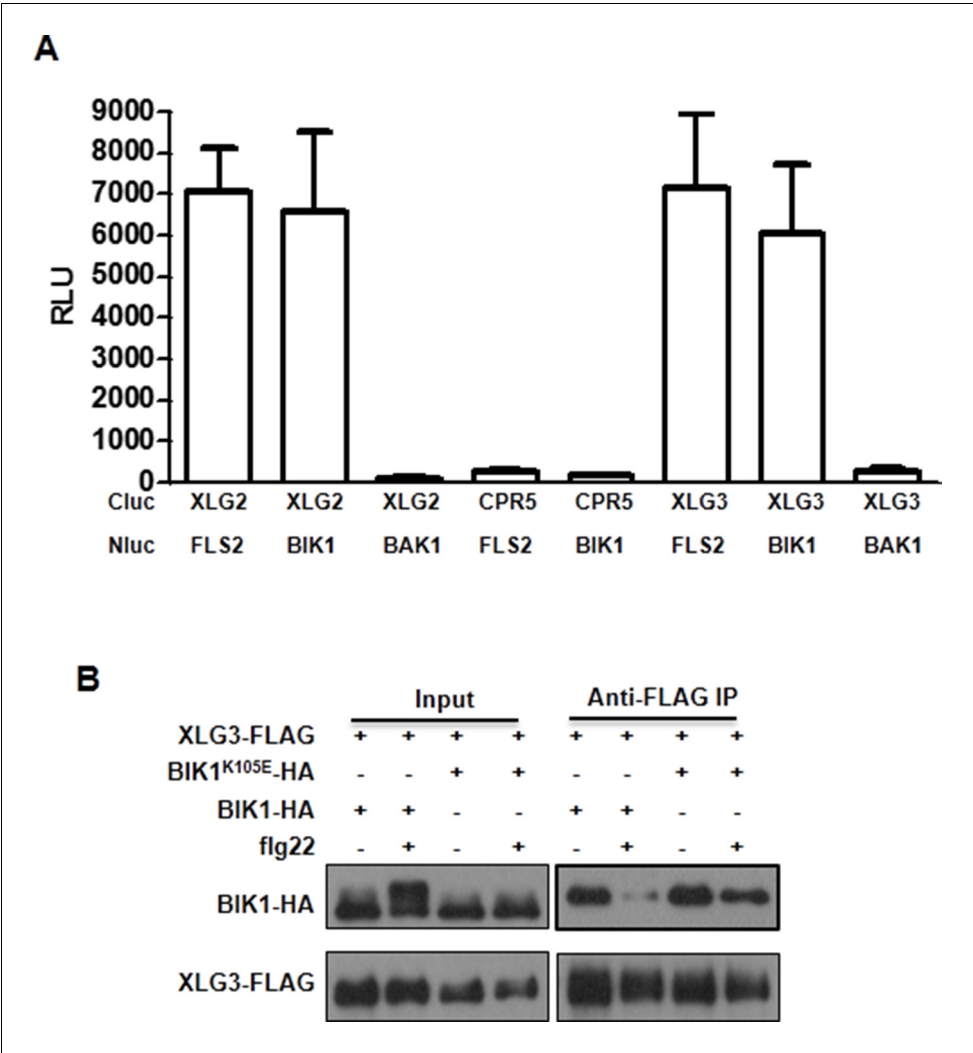

**Figure 2—figure supplement 2.** XLG3 interacts with BIK1. (A) XLG3 interacts with BIK1 in *Nb* plants. Agrobacteria containing the indicated constructs were infiltrated into *Nb* leaves, and luciferase activity was recorded 2 days later (mean  $\pm$  SD;  $n \geq 6$ ). (B) XLG3 interacts with BIK1 in protoplasts. Co-IP assay was performed using WT Arabidopsis protoplasts transfected with the indicated constructs. Representative data from three independent experiments are shown.

DOI: 10.7554/eLife.13568.010



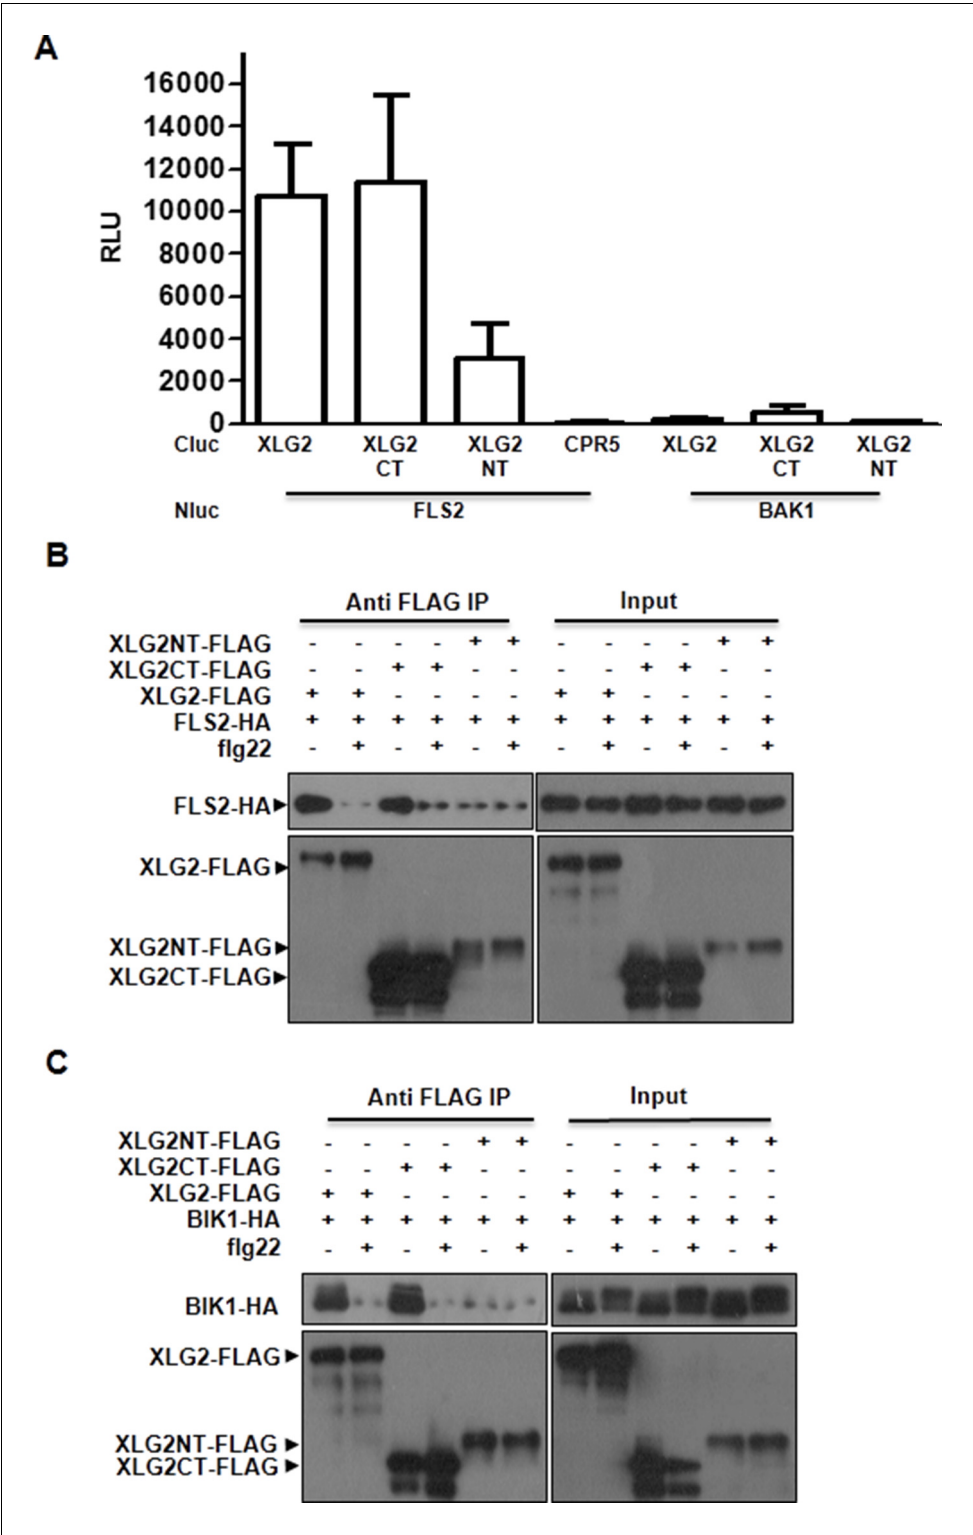

**Figure 2—figure supplement 3.** XLG2 interacts with FLS2 and BIK1 primarily through the C terminus. (A) XLG2 C terminus interacts with FLS2 in *Nb* plants. Agrobacteria carrying the indicated constructs were infiltrated into *Nb* leaves, and luciferase activity was recorded 2 days later (mean  $\pm$  SD;  $n \geq 6$ ). (B) XLG2 C terminus interacts with BIK1. (C) XLG2 C terminus interacts with FLS2. WT Arabidopsis protoplasts were transfected with the indicated constructs, and total protein was subject to Co-IP assays. Two independent experiments were performed with similar results.

Figure 2—figure supplement 3 continued on next page

*Figure 2—figure supplement 3 continued*

DOI: [10.7554/eLife.13568.011](https://doi.org/10.7554/eLife.13568.011)

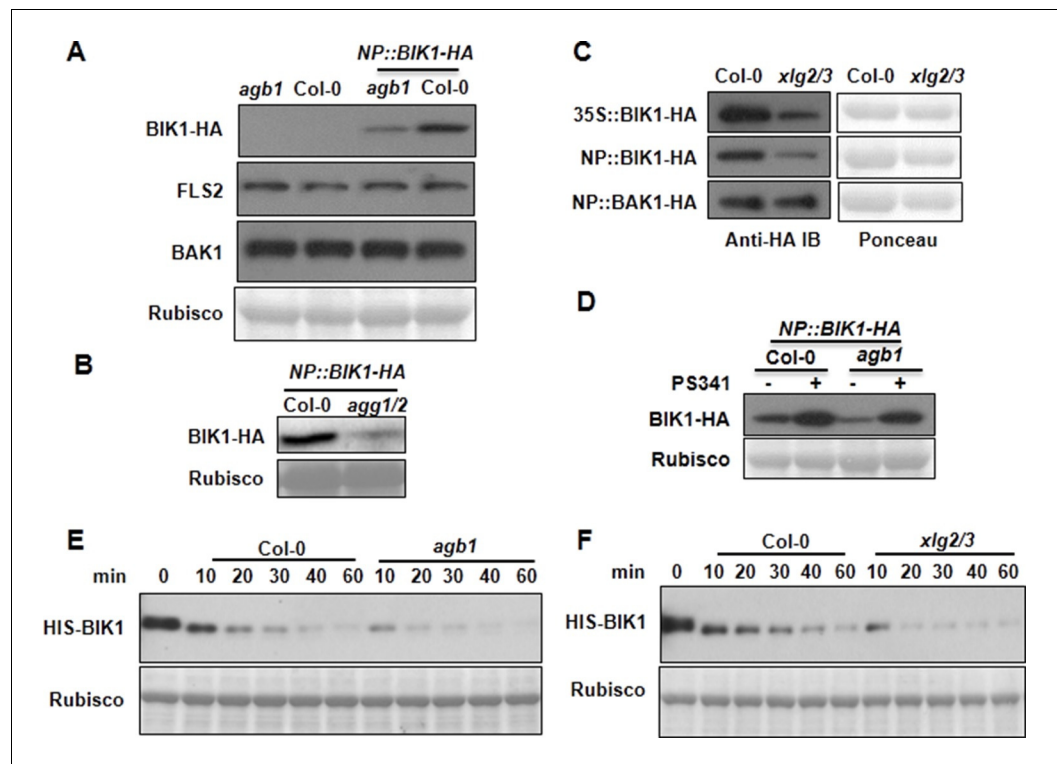

**Figure 3.** G proteins positively regulate immunity and BIK1 stability. (A) *AGB1* is required for accumulation of BIK1, but not FLS2 and BAK1. *BIK1-HA* was introduced into *agb1* by crossing, homozygotes of the indicated genotypes in F3 generation were used for immunoblot analyses. (B) *AGG1/2* are required for BIK1 stability. *NP::BIK1-HA* was introduced into *agg1/2* by crossing, homozygous plants in F3 generation were subject to immunoblot analyses. (C) *XLG2/3* are required for BIK1 accumulation. *NP::BIK1-HA*, *35S::BIK1-HA* and *NP::BAK1-HA* plasmids were transiently expressed in WT and *xlg2/3* protoplasts, and accumulation of BIK1 and BAK1 was determined by immunoblot analyses. (D) *AGB1* regulates BIK1 accumulation through the proteasome pathway. One-week-old *NP::BIK1-HA* seedlings of WT (Col-0) or *agb1* background were pretreated with DMSO (-) or 100  $\mu$ M proteasome inhibitor PS341(+) for 8 hr before total protein was isolated for immunoblot analysis. (E) The *agb1* extract shows accelerated degradation of BIK1 in vitro (F) The *xlg2 xlg3* extract shows accelerated degradation of BIK1. Total extracts from WT (Col-0), *agb1* and *xlg2 xlg3* seedlings were incubated with HIS-BIK1 protein at 22°C for the indicated times, and equal amounts of sample were analyzed using anti-HIS immunoblot. Each experiment was repeated at least three times, and data from one representative experiment are shown.

DOI: 10.7554/eLife.13568.012

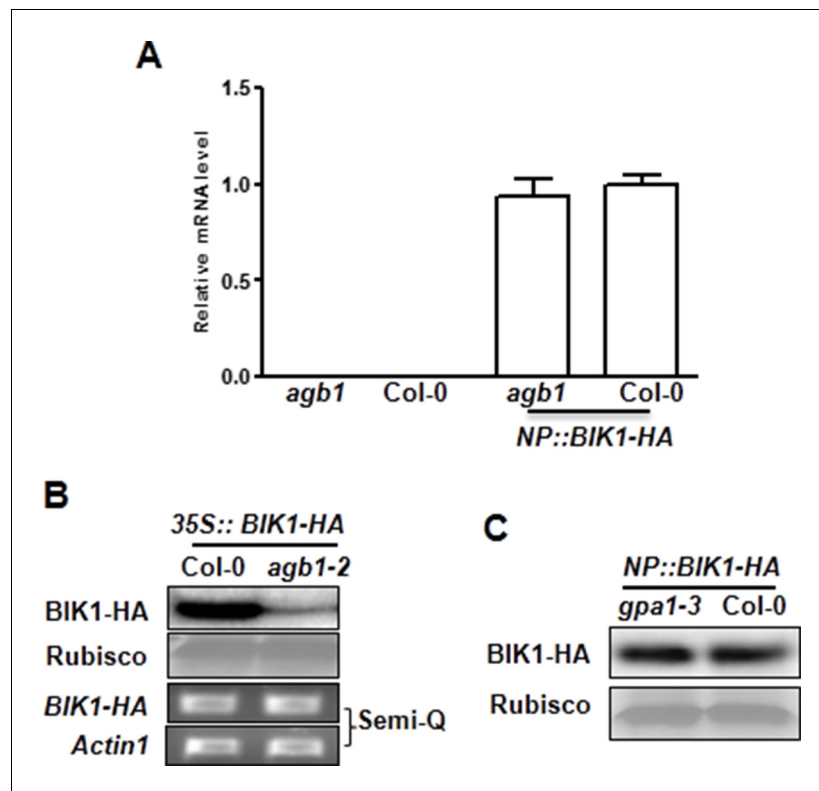

**Figure 3—figure supplement 1.** G proteins are required for BIK1 stability. (A) *agb1* plants are largely normal in *BIK1* transcription. Total RNA was isolated from plants of the indicated genotypes, and quantitative real time PCR was carried out to determine *BIK1-HA* transcript levels. (B) Accumulation of BIK1 expressed from a transgene under control of the constitutive 35S promoter was similarly compromised in the *agb1-2* mutant. 35S::BIK1-HA transgenic lines in WT and *agb1-2* background with similar *BIK1* transcript levels were identified by Semi-qPCR and used for detection of BIK1 accumulation. (C) Accumulation of BIK1 is not compromised in the *gpa1-3* mutant. NP::BIK1-HA was introduced into *gpa1-3* by crossing, and BIK1 accumulation was detected by anti-HA immunoblot. Three independent experiments were performed with similar results.

DOI: [10.7554/eLife.13568.013](https://doi.org/10.7554/eLife.13568.013)

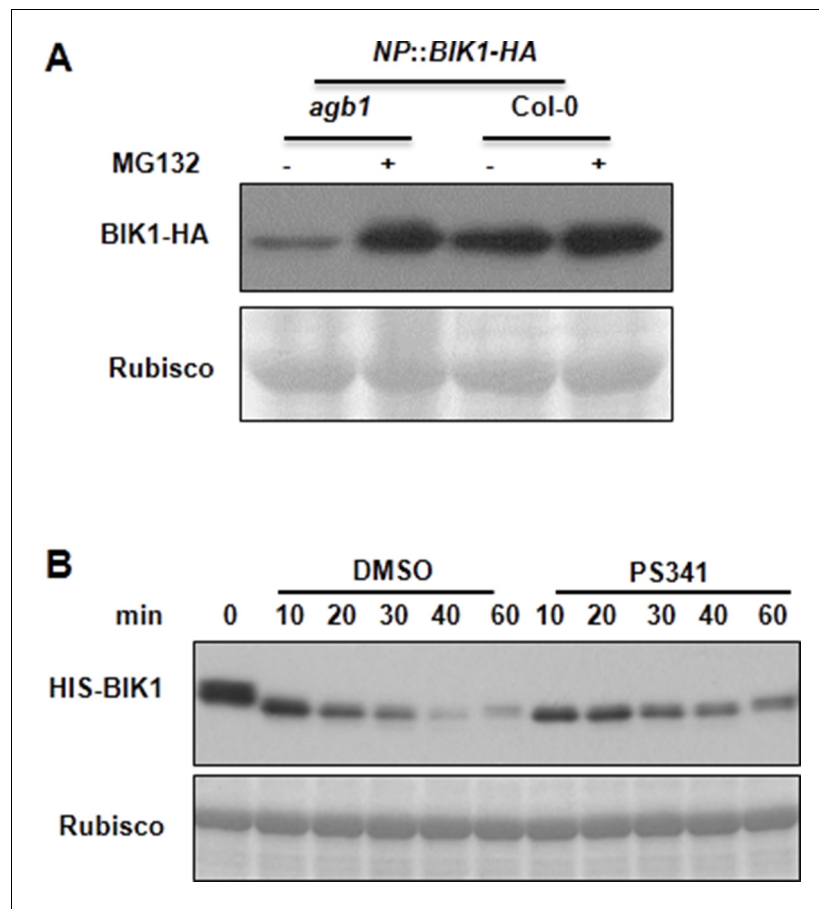

**Figure 3—figure supplement 2.** AGB1 regulates BIK1 stability through proteasome pathway. (A) Treatment with MG132 allows accumulation of BIK1 in *agb1* mutant seedlings. *NP::BIK1-HA* seedlings of WT (*AGB1*) and *agb1* background were treated with DMSO (-) or 100  $\mu$ M specific proteasome inhibitor MG132 (+) for 8 hr, BIK1 stability was detected by anti-HA immunoblot. (B) Treatment with PS341 inhibits BIK1 degradation in vitro. Total extracts from WT plants pretreated with DMSO or 100  $\mu$ M PS341 were incubated with the HIS-BIK1 recombinant protein, and equal amounts of sample were withdrawn at the indicated times for anti-HIS immunoblot assays. Three independent experiments were performed with similar results.

DOI: [10.7554/eLife.13568.014](https://doi.org/10.7554/eLife.13568.014)

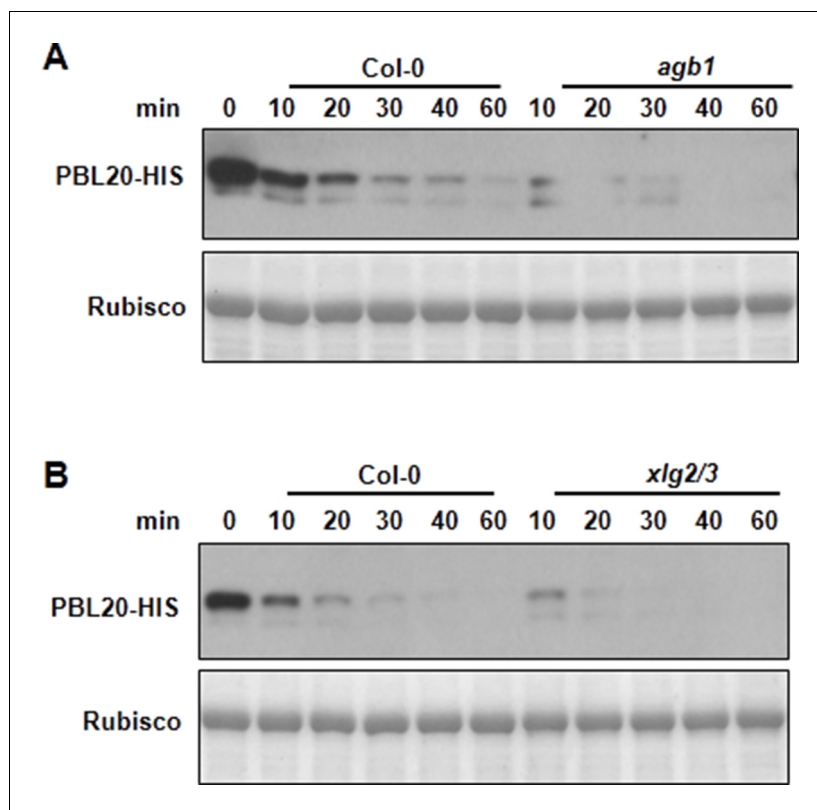

**Figure 3—figure supplement 3.** *AGB1* and *XLG2/3* attenuate PBL20 degradation. (A) Accelerated PBL20 degradation in *agb1* extracts. (B) Accelerated PBL20 degradation in *xlg2 xlg3* extracts. Total extracts from WT, *agb1* and *xlg2/3* were incubated with the PBL20-HIS recombinant protein, and equal amounts of sample were withdrawn at the indicated times for anti-HIS immunoblot analyses. Two independent experiments were performed with similar results.

DOI: [10.7554/eLife.13568.015](https://doi.org/10.7554/eLife.13568.015)

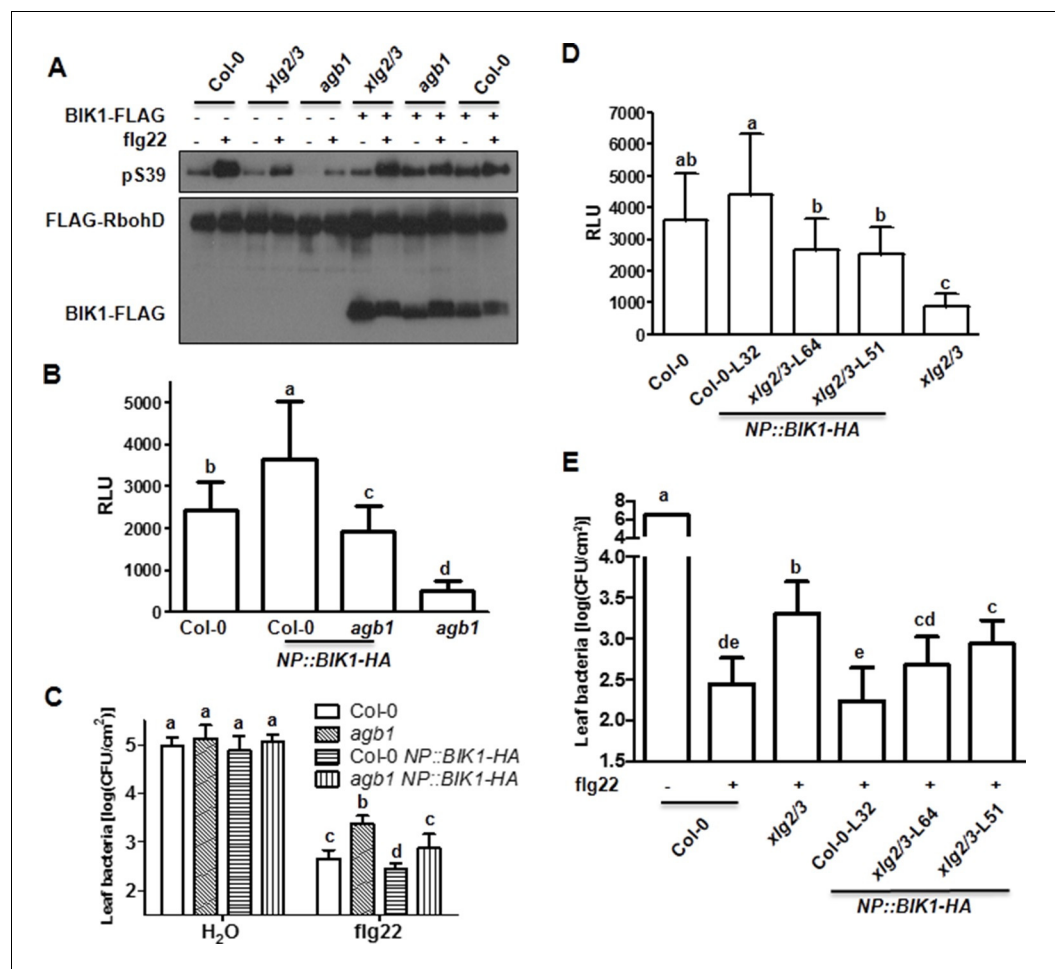

**Figure 4.** BIK1 level accounts for G protein-mediated regulation of FLS2 immunity. (A) Transient expression of BIK1 in *agb1* and *xlg2/3* mutant protoplasts restores RbohD phosphorylation. FLAG-RbohD and BIK1-HA constructs are transiently expressed in protoplasts from WT (Col-0), *agb1* and *xlg2/3*. FLAG-RbohD protein was affinity purified and detected by anti-FLAG and anti-pSer39 immuoblots. (B) *BIK1* transgene restores flg22-induced ROS burst in *agb1*. (C) *BIK1* transgene partially restores flg22-induced resistance to *Pst* in *agb1*. *NP::BIK1-HA* was introduced into *agb1* by crossing, transgenic lines of *agb1* or Col-0 background in the F3 generation were used for the assays. (D) *BIK1* transgene partially restores flg22-induced ROS burst in *xlg2 xlg3* mutant. (E) *BIK1* transgene partially restores flg22-induced resistance to *Pst*. The *NP::BIK1-HA* transgene was introduced into WT (Col-0-L32) and *xlg2 xlg3* (*xlg2/3-L64* and *xlg2/3-L51*) plants by *Agrobacterium*-mediated transformation. Independent T2 transgenic lines were used for the assays. Peak relative luminescence unit (RLU) values were shown for ROS assays (B and D) and leaf bacterial populations 2 days after bacterial inoculation were shown for flg22-protection assays (C and E). Bars in B-E represent mean  $\pm$  SD ( $n \geq 6$ ;  $p < 0.05$ , Student's t-test; different letters indicate significant difference). Each experiment was repeated two (A) or three (B-E) times, and data of one representative experiment are shown.

DOI: 10.7554/eLife.13568.016

The following source data is available for figure 4:

**Source data 1.** Raw data and exact p value of Figure 4B–E.

DOI: 10.7554/eLife.13568.017

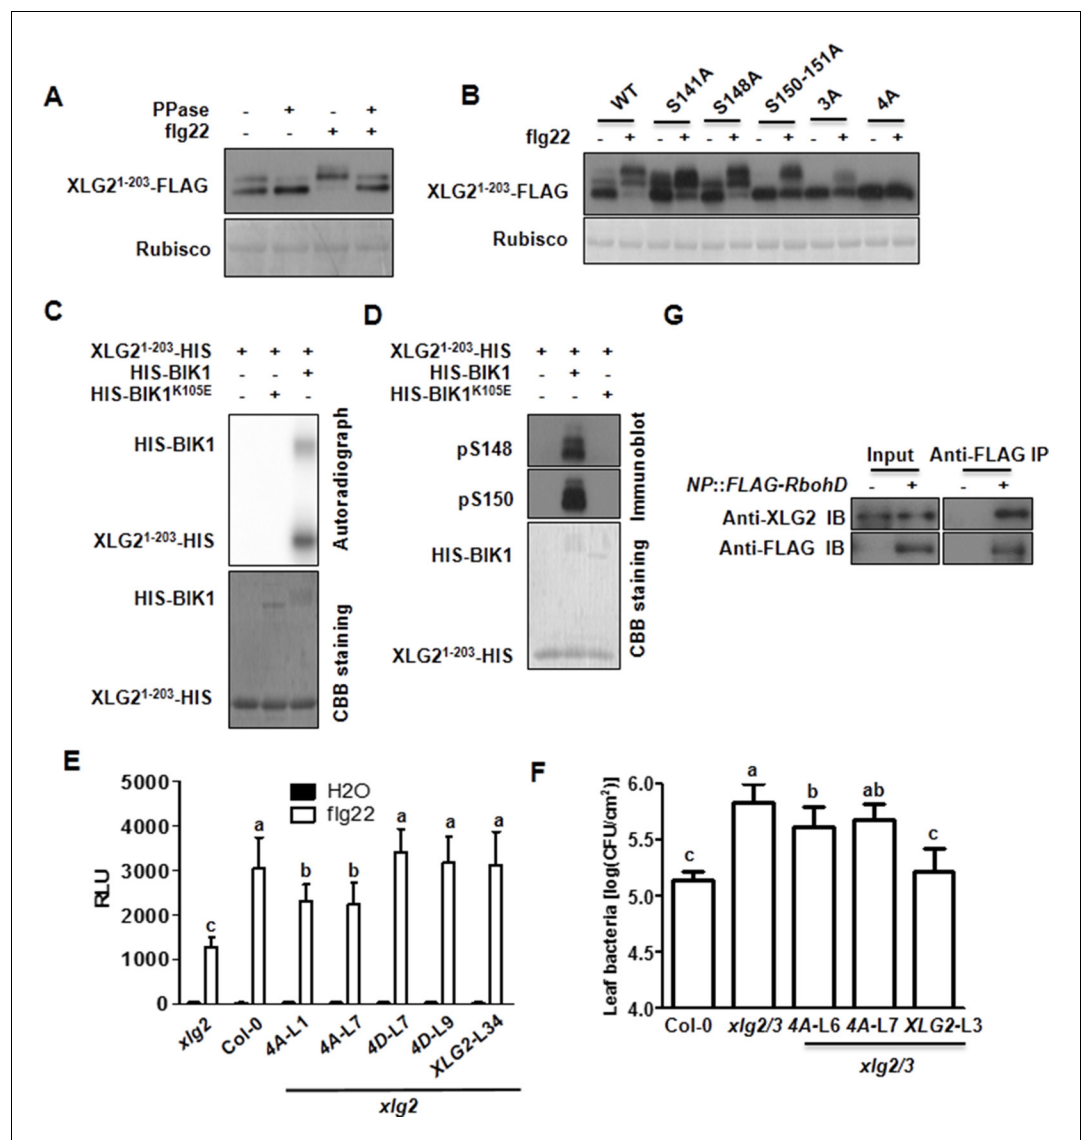

**Figure 5.** Phosphorylation of XLG2 by BIK1 regulates flg22-induced ROS. (A) Flg22-induces phosphorylation of XLG2 in the N terminus. Protoplasts expressing XLG2<sup>1-203</sup>-FLAG were treated with flg22. The total protein was treated with (+) or without (-) λ protein phosphatase (PPase) prior to anti-FLAG immunoblot analysis. (B) Flg22-induced phosphorylation of XLG2 in protoplasts primarily occurs in Ser141, Ser148, Ser150 and Ser151. Different mutated form of XLG2<sup>1-203</sup>-FLAG constructs were transiently expressed in WT protoplast, treated with flg22 and the migration of XLG2<sup>1-203</sup>-FLAG were examined by anti-FLAG immunoblot. (C) BIK1 phosphorylates XLG2 N terminus in vitro. XLG2<sup>1-203</sup>-HIS was incubated with HIS-BIK1 and HIS-BIK1<sup>K105E</sup> in the presence of <sup>32</sup>P-γ-ATP and analyzed by autoradiography. CBB, coomassie brilliant blue. (D) BIK1 phosphorylates XLG2 at Ser148 and Ser150 in vitro. XLG2<sup>1-203</sup>-HIS was incubated with HIS-BIK1 and HIS-BIK1<sup>K105E</sup> in kinase reaction buffer. Protein phosphorylation was detected by anti-pSer148 and pSer150 immunoblots. (E) XLG2 phosphorylation is required for flg22-induced ROS. *xlg2* mutant plants were transformed with WT (NP::XLG2-L34), non-phosphorylatable (4A-L1 and 4A-L7), or phospho-mimicking (4D-L7 and 4D-L9) forms of XLG2 under control of the native XLG2 promoter. Independent T2 lines were examined for flg22-induced ROS burst and peak relative luminescence unit (RLU) values are shown. (mean ± SD; n ≥ 6; p < 0.05, Student's t-test; different letters indicate significant difference). (F) XLG2 phosphorylation is required for *Pst* resistance. *xlg2/3* double mutant plants were transformed with WT (XLG2-L3) or non-phosphorylatable (4A-L6 and 4A-L7) form of XLG2 under control of the native XLG2 promoter. Independent T2 lines were inoculated with *Pst*, and bacterial populations in leaves were measured 3 days post inoculation. (mean ± SD; n ≥ 6; p < 0.05, Student's t-test; different letters indicate significant difference). (G) XLG2 interacts with RbohD in Arabidopsis plants. *rbohD* plants were transformed with the FLAG-RbohD transgene

Figure 5 continued on next page



*Figure 5 continued*

under control of the *RbohD* native promoter. The resulting plants were used for Co-IP assay. Each experiment was repeated two (C, G) or three (A, B, D–F) times, and data of one representative experiment are shown.

DOI: [10.7554/eLife.13568.018](https://doi.org/10.7554/eLife.13568.018)

The following source data is available for figure 5:

**Source data 1.** Raw data and exact p value of **Figure 5E** and **F**.

DOI: [10.7554/eLife.13568.019](https://doi.org/10.7554/eLife.13568.019)

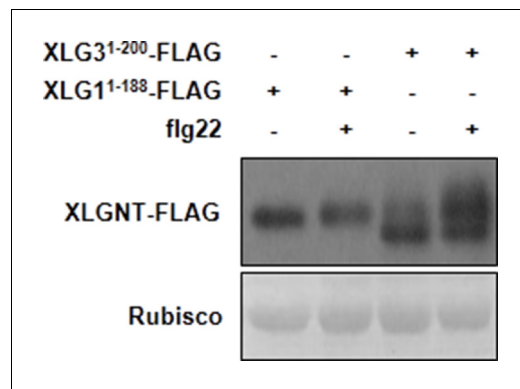

**Figure 5—figure supplement 1.** The N terminus of XLG3, but not XLG1, is phosphorylated upon flg22-treatment. WT protoplasts were transfected with XLG1<sup>1-188</sup>-FLAG or XLG3<sup>1-200</sup>-FLAG, treated with flg22, and protein was analyzed by anti-FLAG immunoblot.  
[DOI: 10.7554/eLife.13568.020](https://doi.org/10.7554/eLife.13568.020)

| Phospho-peptide sequence                | Position   | Phospho-peptide sequence                                     | Position             |
|-----------------------------------------|------------|--------------------------------------------------------------|----------------------|
| KLLPFP <sub>p</sub> SPNPK               | S13        | SPADFRLSP <sub>p</sub> SSPLSASAR                             | S150                 |
| LLPFP <sub>p</sub> SPNPK                | S13        | SPADFRL <sub>p</sub> SP <sub>p</sub> (SS)PLSASAR             | S148 S150/151        |
| RDNRE <sub>p</sub> SDDDDETSSGYR         | S23        | SPADFRLSP <sub>p</sub> S <sub>p</sub> SPL <sub>p</sub> SASAR | S150 S151 S154       |
| DNRE <sub>p</sub> SDDDDETSSGYR          | S23        | LSP <sub>p</sub> (SS)PLSASAR                                 | S150/151             |
| ALPVEVDQIPTALPV <sub>p</sub> SFSSLR     | S69        | L <sub>pp</sub> (SPSSPLSAS)AR                                | S148/150/151/154/156 |
| ALPVEVDQIPTALPVSF <sub>p</sub> (SS)LR   | S71/72     | LSPSSPLSAP <sub>p</sub> SAREEDHLDDDR                         | S156                 |
| DVVSGL <sub>p</sub> (SSSSSS)K           | S(124-130) | Lpp(SPSSPLSAS)AREEDHLDDDRVSDVGPR                             | S148/150/151/154/156 |
| DVVSGL <sub>p</sub> (SSSSSS)KR          | S(124-130) | EEDHLDDDRV <sub>p</sub> SDVGPR                               | S169                 |
| DVVSGL <sub>pp</sub> (SSSSSS)KRLDVPEEVK | S(124-130) | FVEPFQSSSECDESSYV <sub>p</sub> SDGESIAATHR                   | S194                 |
| RLDVPEEVK <sub>p</sub> SPADFR           | S141       | FVEPFQSSSECDE <sub>p</sub> SYVSDGESIAATHR                    | S191                 |
| LDVPEEVK <sub>p</sub> SPADFR            | S141       | QSSECDESSYV <sub>p</sub> SDGESIAATHR                         | S194                 |
| SPADFRL <sub>p</sub> SPSSPLSASAR        | S148       | SLYNV <sub>p</sub> SFSLEDR                                   | S488                 |
|                                         |            | TCEWFEDFNPLISQNG <sub>p</sub> (TS)R                          | T773/S774            |

**Figure 5—figure supplement 2.** Phospho-sites in XLG2 isolated from flg22-treated protoplasts. List of phospho-peptides identified. Protoplasts prepared from WT plants were transfected with XLG2-FLAG and treated with flg22 for 10 min, affinity-purified and subjected to LC-MS/MS for phospho-sites identification.

DOI: [10.7554/eLife.13568.021](https://doi.org/10.7554/eLife.13568.021)

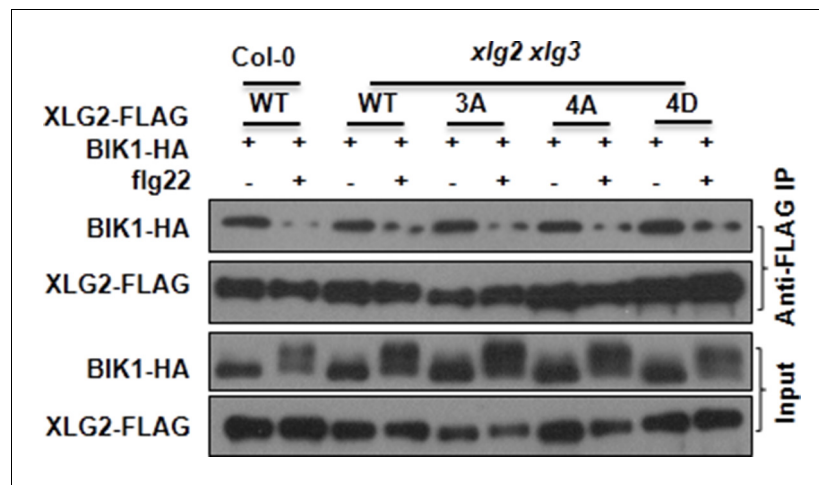

**Figure 5—figure supplement 3.** Mutations that block or mimic XLG2 phosphorylation do not impact BIK1 stability and XLG2-BIK1 interaction. WT or *xlg2 xlg3* protoplasts were transfected with BIK1-HA along with WT, non-phosphorylatable (3A, 4A), phospho-mimicking (4D) forms of XLG2-FLAG constructs, treated with (+) or without (-) flg22, and total protein was subject to Co-IP assays and immunoblot analysis. Three independent experiments were performed with similar results.

DOI: [10.7554/eLife.13568.022](https://doi.org/10.7554/eLife.13568.022)

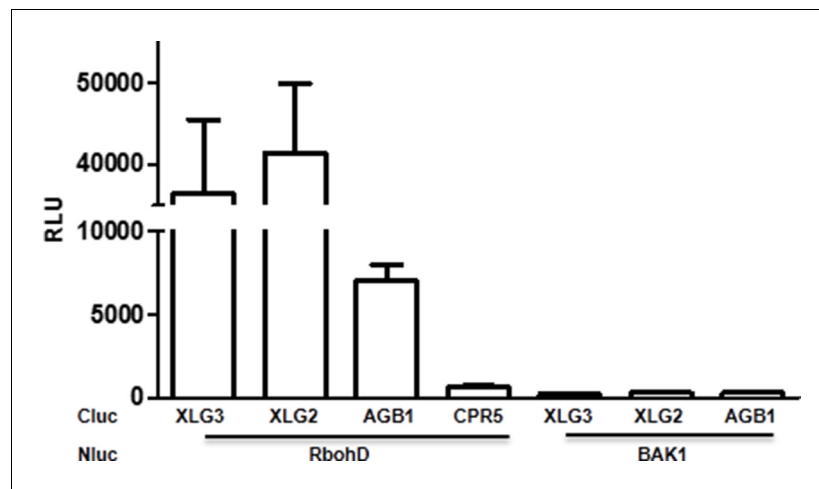

**Figure 5—figure supplement 4.** XLG2/3 interact with RbohD in Nb plants. Agrobacteria containing the indicated constructs were infiltrated into *Nb* leaves, and luciferase activity was recorded 2 days later (mean  $\pm$  SD;  $n \geq 6$ ; representative data from 2 independent experiments are shown).

DOI: [10.7554/eLife.13568.023](https://doi.org/10.7554/eLife.13568.023)

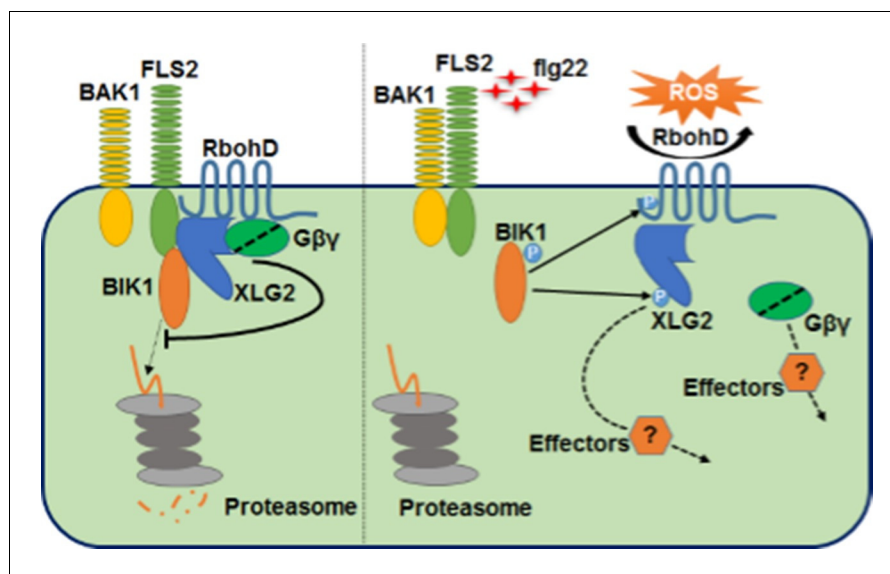

**Figure 6.** Model for G protein-coupled FLS2 signaling. In the pre-activation state, the heterotrimeric G proteins composed of XLG2/3, AGB1, and AGG1/2 interact with the FLS2-BIK1 complex. Stimulation by flg22 induces BAK1-FLS2 interaction and activation of the receptor complex. This leads to the activation of the G proteins and phosphorylation of XLG2 in the N terminus. The activated G proteins dissociate from the receptor complex and regulate RbohD and other downstream effectors to positively modulate immune responses.

DOI: [10.7554/eLife.13568.024](https://doi.org/10.7554/eLife.13568.024)
